# Supplementary material for: Overcoming Factionalism in Serious Mental Illness Policy Making: A Counter-Perspective
Source: Atypon-hosted journal article supplement (doi:10.1176/appi.ps.202100613), 2022-01-19
Supplement: appi.ps.202100613.ds001.pdf [file appi.ps.202100613.ds001.pdf]

### **Supplemental Information: Full Reference List**

- A1. Benhabib, S. Activist challenges to deliberative democracy. *Political Theory* 2001; 29 5: 670-90.
- A2. Walzer, M. Deliberation, and What Else? In *Politics and Passion* Yale University Press. 1999; 90-109.
- A3. Michelman, F. How Can the People Ever Make the Law? A Critique of Deliberative Democracy. In *Deliberative democracy: Essays on reason and politics*, eds James Bohman and William Rehg. MIT press; 1997.
- A4. Pennington, M. (2003). Hayekian political economy and the limits of deliberative democracy. *Political Studies* 2003; 51(4), 722-739.
- A5. Bashir B. Reconciling historical injustices: Deliberative democracy and the politics of reconciliation. *Res Publica* 2012; 18: 127-43.
- A6. Chambers SA. Working on the democratic imagination and the limits of deliberative democracy. *Political Research Quarterly* 2005; 58: 619-23.
- A7. Devenney M. The limits of communicative rationality and deliberative democracy. *Journal of Power* 2009; 2:137-154.
- A8. Mouffe C. Deliberative democracy or agonistic pluralism?. *Social Research* 1999; 745-758.
- A9. Mouffe C. Which Ethics for Democracy?. In *The turn to ethics* 2013 (pp. 99-108). Routledge.
- A10. Kapoor I. Deliberative democracy or agonistic pluralism? The relevance of the Habermas-Mouffe debate for third world politics. *Alternatives* 2002; 27: 459-87.
- A11. Welsh S. Deliberative democracy and the rhetorical production of political culture. *Rhetoric & Public Affairs* 2002; 5: 679-707.
- A12. Van Bouwel J. The problem with (out) consensus: The scientific consensus, deliberative democracy and agonistic pluralism. In *The social sciences and democracy* 2009 (pp. 121-142). Palgrave Macmillan, London.
- A13. Greenhalgh T, Snow R, Ryan S, Rees S, Salisbury H. Six 'biases' against patients and carers in evidence-based medicine. *BMC Medicine* 2015 Dec;13(1):1-1.
- A14. Greenhalgh T. Why do we always end up here? Evidence-based medicine's conceptual cul-de-sacs and some off-road alternative routes. *Journal of Primary Health Care* 2011: 92-8.
- A15. Kelly MP, Heath I, Howick J, Greenhalgh T. The importance of values in evidence-based medicine. *BMC Medical Ethics* 2015; 16: 1-8.
- A16. Every-Palmer S, Howick J. How evidence-based medicine is failing due to biased trials and selective publication. *Journal of Evaluation in Clinical Practice* 2014; 20: 908-14.
- A17. Tonelli M. The philosophical limits of evidence-based medicine. *Academic Medicine*. 1998; 73-9.
- A18. Crowe S, Fenton M, Hall M, Cowan K, Chalmers I. Patients', clinicians' and the research communities' priorities for treatment research: there is an important mismatch. *Research Involvement and Engagement* 2015; 1: 1-0.
- A19. Staley K, Doherty C. It's not evidence, it's insight: bringing patients' perspectives into health technology appraisal at NICE. *Research Involvement and Engagement* 2016 Dec;2(1):1-2.

- A20. Carel H, Kidd IJ. Epistemic Injustice in Healthcare: A Philosophical Analysis. *Medicine, Health Care, and Philosophy* 2014; 17: 529-40.
- A21. Solomon M. Just a paradigm: evidence-based medicine in epistemological context. *European Journal for Philosophy of Science* 2011; 1: 451-9.
- A22. Tanenbaum SJ. Evidence-based practice as mental health policy: Three controversies and a caveat. *Health Affairs* 2005; 24: 163-73.
- A23. Morgan A. Is psychiatry dying?: crisis and critique in contemporary psychiatry. *Social Theory and Health* 2015; 13: 141-61.
- A24. Hamilton, A., Madison, J., & Jay, J. *The Federalist Papers*. Palgrave Macmillan, New York. 2009.
- A25. Glickman, A., & Sisti, D. A. Medicaid's Institutions for Mental Diseases (IMD) exclusion rule: a policy debate—argument to repeal the IMD rule. *Psychiatric Services* 2019; 70: 7-10.
- A26. Mathis, J. Medicaid's institutions for mental diseases (IMD) exclusion rule: a policy debate—argument to retain the IMD rule. *Psychiatric Services* 2019; 70, 4-6.
- A27. Jones N, Atterbury K, Byrne L, Carras M, Brown M, Phalen P. Lived experience, research leadership, and the transformation of mental health services: Building a researcher pipeline. *Psychiatric Services* 2021; 72: 591-3.
- A28. Brown M, Jones N. Service user participation within the mental health system: Deepening engagement. *Psychiatric Services* 2021; in press.
- A29. Atterbury K. Preserving the person: The ethical imperative of recovery-oriented practices. *American Journal of Orthopsychiatry* 2014; 84: 182-7.
- A30. Atterbury K, Rowe M. Citizenship, community mental health, and the common good. *Behavioral Sciences & the Law* 2017; 35: 273-87.
